# Supplementary material for: Motifome comparison between modern human, Neanderthal and Denisovan
Source: PubMed Central journal article supplement (PMC6006668; doi:10.1186/s12864-018-4710-1), 2018-06-18
Supplement: 12864_2018_4710_MOESM5_ESM.pdf [file 12864_2018_4710_MOESM5_ESM.pdf]

| motif length              | number of possible motifs | top motifs, modern human | top motifs, Denisova | common motifs | p_value |
|---------------------------|---------------------------|--------------------------|----------------------|---------------|---------|
| <b>whole genome</b>       |                           |                          |                      |               |         |
| 6                         | 4096                      | 1000                     | 1000                 | 862           | 0       |
| 7                         | 16384                     | 1000                     | 1000                 | 702           | 0       |
| 8                         | 65536                     | 1000                     | 1000                 | 453           | 0       |
| 9                         | 262144                    | 1000                     | 1000                 | 172           | 1E-226  |
| 10                        | 1048576                   | 1000                     | 1000                 | 52            | 3E-71   |
| <b>core promoters</b>     |                           |                          |                      |               |         |
| 6                         | 4096                      | 1000                     | 1000                 | 965           | 0       |
| 7                         | 16384                     | 1000                     | 1000                 | 938           | 0       |
| 8                         | 65536                     | 1000                     | 1000                 | 907           | 0       |
| 9                         | 262144                    | 1000                     | 1000                 | 905           | 0       |
| 10                        | 1048576                   | 1000                     | 1000                 | 869           | 0       |
| <b>proximal promoters</b> |                           |                          |                      |               |         |
| 6                         | 4096                      | 1000                     | 1000                 | 913           | 0       |
| 7                         | 16384                     | 1000                     | 1000                 | 864           | 0       |
| 8                         | 65536                     | 1000                     | 1000                 | 789           | 0       |
| 9                         | 262144                    | 1000                     | 1000                 | 719           | 0       |
| 10                        | 1048576                   | 1000                     | 1000                 | 631           | 0       |
| <b>distal promoters</b>   |                           |                          |                      |               |         |
| 6                         | 4096                      | 1000                     | 1000                 | 836           | 0       |
| 7                         | 16384                     | 1000                     | 1000                 | 733           | 0       |
| 8                         | 65536                     | 1000                     | 1000                 | 589           | 0       |
| 9                         | 262144                    | 1000                     | 1000                 | 348           | 0       |
| 10                        | 1048576                   | 1000                     | 1000                 | 189           | 0       |
| <b>all introns</b>        |                           |                          |                      |               |         |
| 6                         | 4096                      | 1000                     | 1000                 | 849           | 0       |
| 7                         | 16384                     | 1000                     | 1000                 | 664           | 0       |
| 8                         | 65536                     | 1000                     | 1000                 | 411           | 0       |
| 9                         | 262144                    | 1000                     | 1000                 | 148           | 3E-184  |
| 10                        | 1048576                   | 1000                     | 1000                 | 39            | 7.1E-49 |
